# Vacuolar Protein Sorting Receptor in *Giardia lamblia*

Maria R. Rivero<sup>1</sup>\*, Silvana L. Miras<sup>1</sup>\*, Constanza Feliziani<sup>1</sup>, Nahuel Zamponi<sup>1</sup>, Rodrigo Quiroga<sup>2</sup>, Stanley F. Hayes<sup>3</sup>#, Andrea S. Rópolo<sup>1</sup>, María C. Touz<sup>1</sup>\*

**1** Instituto de Investigación Médica Mercedes y Martín Ferreyra, Universidad Nacional de Córdoba, Córdoba, Córdoba, Argentina, **2** Departamento de Química Biológica, Facultad de Ciencias Químicas, Universidad Nacional de Córdoba, Córdoba, Córdoba, Argentina, **3** Rocky Mountain Laboratory, NIAID, National Institutes of Health, Hamilton, Montana, United States of America

## Abstract

In *Giardia*, lysosome-like peripheral vacuoles (PVs) need to specifically coordinate their endosomal and lysosomal functions to be able to successfully perform endocytosis, protein degradation and protein delivery, but how cargo, ligands and molecular components generate specific routes to the PVs remains poorly understood. Recently, we found that delivering membrane Cathepsin C and the soluble acid phosphatase (AcPh) to the PVs is adaptin (AP1)-dependent. However, the receptor that links AcPh and AP1 was never described. We have studied protein-binding to AcPh by using H6-tagged AcPh, and found that a membrane protein interacted with AcPh. This protein, named GLVps (for *Giardia lamblia* Vacuolar protein sorting), mainly localized to the ER-nuclear envelope and in some PVs, probably functioning as the sorting receptor for AcPh. The tyrosine-binding motif found in the C-terminal cytoplasmic tail domain of GLVps was essential for its exit from the endoplasmic reticulum and transport to the vacuoles, with this motif being necessary for the interaction with the medium subunit of AP1. Thus, the mechanism by which soluble proteins, such as AcPh, reach the peripheral vacuoles in *Giardia* appears to be very similar to the mechanism of lysosomal protein-sorting in more evolved eukaryotic cells.

**Citation:** Rivero MR, Miras SL, Feliziani C, Zamponi N, Quiroga R, et al. (2012) Vacuolar Protein Sorting Receptor in *Giardia lamblia*. PLoS ONE 7(8): e43712. doi:10.1371/journal.pone.0043712

**Editor:** Ludger Johannes, Institut Curie, France

**Received:** January 10, 2012; **Accepted:** July 24, 2012; **Published:** August 20, 2012

**Copyright:** © 2012 Rivero et al. This is an open-access article distributed under the terms of the Creative Commons Attribution License, which permits unrestricted use, distribution, and reproduction in any medium, provided the original author and source are credited.

**Funding:** The project was supported by Grant Number R01TW00724 from the Fogarty International Center. The content is solely the responsibility of the authors and does not necessarily represent the official views of the Fogarty International Center or the National Institutes of Health. This research was also supported in part by the Argentine National Agency for the Promotion of Science and Technology (FONCYT), and the National Council for Sciences and Technology (CONICET). The funders had no role in study design, data collection and analysis, decision to publish, or preparation of the manuscript.

**Competing Interests:** The authors have declared that no competing interests exist.

\* E-mail: ctouz@immmf.uncor.edu

# These authors contributed equally to this work.

# Current address: 108 High Road, Hamilton, Montana, United States of America

## Introduction

Trafficking of newly synthesized lysosomal soluble enzymes from the trans-Golgi network (TGN) to lysosomes in mammalian cells occurs indirectly, via the plasma membrane followed by endocytosis, or directly, via the endosomal system. In these cells, the mannose 6-phosphate receptors (MPRs) bind with high affinity to phosphomannosyl residues attached to the ligand proteins, while their cytoplasmic tails contain motifs capable of recognizing components of the clathrin-coated vesicles that are directed to the endosome/lysosome pathway. In the endosome, the receptor-ligand complexes are dissociated and the receptor is recycled to a late Golgi compartment, while the hydrolase ends up on the lysosome (reviewed by [1,2]). In a similar way, sorting of soluble vacuolar hydrolases (e.g. carboxypeptidase Y, CPY) in yeast depends on the VPS10p (vacuolar protein sorting 10 protein) [3], although the sorting is dependent, not on oligosaccharide residues [4], but on sequences in the vacuolar proteins or a structural determinant that might be recognized directly by the receptor [5]. While in the TGN, the MPRs and Vps10p bind soluble hydrolases, their cytoplasmic tail packages them into clathrin-coated vesicles, aided by adaptor proteins. Heterotetrameric adaptor-protein (AP) complexes or the GGA (Golgi-localized,  $\gamma$ -ear-containing, Arf-binding family of proteins) monomeric adaptor proteins recognize a tyrosine (Y)-based signal (YXX $\Phi$ ) with a large

hydrophobic residue ( $\Phi$ ) or a dileucine motif ([DE]XXXL[LI]) on cytosolic domains of these membrane receptors, respectively [2]. Proper adaptor binding will result in delivery of hydrolases to the late endosomes [2,6].

Lysosomal protein trafficking in the early branching protist *Giardia lamblia* (syn. *Giardia duodenalis*, *G. intestinalis*) seems to be conserved, although some interesting particularities are present [7,8]. First, this parasite lacks a defined Golgi apparatus for the sorting station [8,9,10] and the endosomal/lysosomal system is being represented by unique organelles defined as peripheral vacuoles (PVs) [11,12,13,14]. While lysosomal membrane proteins follow the mammalian principles of binding to adaptor protein complexes (AP1 or AP2) and clathrin [13,14] to be delivered to the PVs, the sorting and trafficking of soluble hydrolases remains unknown in this parasite. Previously, we observed that the soluble acid phosphatase (AcPh) of *G. lamblia* localized in the PVs and in the endoplasmic reticulum and was present in the nuclear envelope [13], in agreement with the enzyme cytochemical localization [11]. Also, we reported that depletion of the medium subunit of AP1 resulted in AcPh retention in the endoplasmic reticulum (ER), with this enzyme being mislocalized from the PVs [13]. These results indicated the presence of a membrane protein receptor in order for the AcPh to be successfully delivered to the PVs.

In this report, we show that a membrane protein named GIVps (for *Giardia lamblia* Vacuolar protein sorting), is localized to the ER-nuclear envelope and might serve as the sorting receptor for AcPh. GIVps subcellular localization depended on the presence of an YXXØ motif and on the medium subunit ( $\mu$ 1) of AP1. Because acid phosphatase activity decreased upon receptor down-regulation, we suggest that it might be involved in AcPh trafficking toward the PVs. These findings will advance our understanding of the molecular mechanism underlying soluble hydrolase sorting, opening new avenues for the comprehension of lysosomal protein-trafficking in parasites.

## Materials and Methods

### Antibodies and other reagents

Anti-HA and anti-V5 mAb were purchased from Sigma (St. Louis, MO). 9C9 mAb was employed to detect the ER-BiP protein [15]. Anti- $\mu$ 2 mAb 2F5 was used for the  $\mu$ 2 subunit of AP2 [14]. 5C1 mAb was used to detect VSP1267 [16]. Alexa Fluor 488 and 555 was used for the primary antibody label (Zenon Tricolor Mouse IgG1 Labeling Kit, Molecular Probes, Invitrogen). Digitonin and Triton X-100 were also purchased from SIGMA.

### Giardia cell lines and vectors

Trophozoites of the isolate WB, clone 1267 [17] were cultured in TYI-S-33 medium supplemented with 10% adult bovine serum and 0.5 mg/ml bovine bile, as previously described [18]. These trophozoites were used as hosts for the expression of transgenic genes and as wild-type controls. **pTubAcPh-V5/H<sub>6</sub>pac** that carries the AcPh gene and the sequences encoding the V5 epitope plus six His at the C-terminus was used to stably express the AcPh-V5/H<sub>6</sub> fusion protein [12]. The GIVps open reading frame was amplified from genomic DNA using the F1 (CATTGGGCCC-CAGCACCCCGTTTTACTCGAA) and R1 (CATTCCCGGG-GACGATGATTTGGTAGACCGT) primers and cloned into the plasmid **pTubHAc-pac** [12] to generate the **pGIVps-HA** vector. The mutant of GIVps lacking the lysosomal motif was amplified using the F1 and R2 (CATTCCCGGGGACCGTCCGGCC-GAAAGCTACCAGCA) primers and cloned into the **pTubHAc-pac** vector to generate the **pGIVps<sub>YQII</sub>-HA** expression plasmid. Stable episomal transfection was performed as previously described [13,19,20,21,22]. All vectors contained a puromycin cassette under the control of the endogenous non-regulated *gdh* promoter for cell selection. Drug-resistant trophozoites were usually apparent by 7–10 days post-transfection. Trophozoites transfected with dsRNA- $\mu$ a plasmid (for  $\mu$ 1 knock-down) [13] were cotransfected with the **pGIVps-HA** vector, selected with puromycin, grown in complete medium and the  $\mu$ 1 antisense induced with 10  $\mu$ g/ml of tetracycline. For GIVps antisense, the first 1000 nt of the ORF was amplified using the ASF (CATTCCCGGGATGCAGCACCCCGTTTTACTCGAAA) and ASr (CATTCCATGGTGCAAGCAGCATTAGAG-GACCGGAT) primers, restricted and ligated to the **pTubHAc-pac** in the opposite direction resulting in the antisense vector that was used for inhibition of GIVps expression. Trophozoites transfected with empty **pTubHAc-pac** plasmid was used as control.

### Immunoelectron Microscopy

*Giardia* trophozoites were rinsed twice with PBS and 0.1% growth medium, chilled, attached to Thermanox coverslips (Nunc, Naperville, IL) and reacted for 2 h in fixative containing 3 parts solution A (0.1 M lysine-HCl-NaPO<sub>4</sub>), 1 part solution B (8% paraformaldehyde, 21.3 mg of sodium periodate, and 100  $\mu$ l of

25% glutaraldehyde), and an additional 0.1% glutaraldehyde. The coverslips were then rinsed in PBS and permeabilized with 0.05% saponin in PBS for 5 min at room temperature. For immunostaining, anti-V5 mAb diluted 1:1000 in a 3% globulin-free bovine serum albumin (BSA)-PBS (Sigma) solution was added at room temperature for 1 h. After PBS-BSA washes, the 1.4 nm fluoronogold anti-mouse immunoglobulin G Fab antibody (Nanoprobes, Yaphank, N.Y.), diluted 1:30 in PBS-BSA with either 0.05% saponin, was added for 1 h at room temperature. The coverslips were washed five times in PBS and stored at 4°C in postfixative (2.5% glutaraldehyde, 4% paraformaldehyde) until they were used. The coverslips were washed in H<sub>2</sub>O and reacted for 4 min in the dark with a solution of HQ silver reagents (Nanoprobes) at an equal ratio of red-blue-white to enhance the signal. The coverslips were then washed three times in H<sub>2</sub>O and one time in 1% aqueous tannic acid for 5 min, followed by an H<sub>2</sub>O rinse. Next, the coverslips were reacted with a solution of reduced K<sub>4</sub>(FeCN)<sub>6</sub> and 1% osmium tetroxide for 15 min, followed by two rinses in H<sub>2</sub>O. They were then subjected to a 5-min graded alcohol dehydration series of 50, 80, 95, and 100%, infiltrated with Spurr's resin, and polymerized at 60°C. The samples were then sectioned and examined using a Hitachi H7500 electron microscope equipped with a Hamamatsu digital camera (Advanced Microscopy Techniques Corp., Danvers, Mass.). The resulting images were digitally recorded.

### ELF97 Endogenous Phosphatase Substrate

ELF97 phosphatase substrate [2-(5-chloro-2-phosphoryloxyphenyl)-6-chloro-4-(3H)quinazolinone(CPPCQ)] (Molecular Probes; Eugene, OR) was used to test phosphatase activity following the protocol suggested by the company. Diverse concentrations of ELF97 and incubation times were tested; with the 20  $\mu$ M concentration and 15 min incubation being the most appropriate conditions. The wild-type and transgenic trophozoites were incubated with ELF97 substrate in 110 mM acetate buffer (pH 5.5), containing 1.1 mM sodium nitrite (for acid phosphatase activity) or 10 mM potassium phosphate buffer (pH 7.0) (for alkaline phosphatase activity) [23,24,25,26]. The fluorescence signal was analyzed and documented by conventional fluorescence microscopy, using a 364 nm Argon laser (Carl Zeiss Axiovert 35M) and captured with a silicon-intensified target camera (SIT-C2400; Hamamatsu Phototronics, Bridgewater, NJ). For quantitative fluorescent measurements of ELF 97, the Fiji image processing package (<http://fiji.sc/wiki/index.php/Fiji>) was used. Differences among groups were analyzed using the Mann-Whitney U test.

### Pull-down assay

AcPh-V5/H<sub>6</sub> and wild-type trophozoites were grown, harvested and suspended in 1 ml of lysis buffer (50 mM NaH<sub>2</sub>PO<sub>4</sub>, 300 mM NaCl, 10 mM imidazol, pH 8.0, 1% Triton X-100, and protease inhibitors) for 3 hours at 4°C. After mild sonication using a Branson sonifier 250 (Branson, CT) with an output control of 3 and a 50% duty cycle (sonication complex), the lysate was centrifuged at 7500 g, for 30 minutes at 4°C. Each supernatant was then mixed with 200  $\mu$ l of Ni-agarose beads (QIAGEN, Valencia, CA) and incubated for 4 hours at 4°C. Beads were spun down at 700 g and washed four times with wash buffer (50 mM NaH<sub>2</sub>PO<sub>4</sub>, 300 mM NaCl, pH 8.0, 0.1% Triton X-100, and protease inhibitors). Bound proteins were eluted four times with 100  $\mu$ l elution buffer (50 mM NaH<sub>2</sub>PO<sub>4</sub>, 300 mM NaCl, 250 mM imidazol, pH 8.0, 0.1% Triton X-100, and protease inhibitors). AcPh-V5/H<sub>6</sub>-bound proteins were analyzed by SDS-PAGE, stained with Coomassie G-250. The detected bands were cut out and submitted to the Research Technologies Branch for

Protein Identification (NIAID, NIH) for LC-MS/MS analysis. After three independent experiments, three proteins that were associated with AcPh-V5/H<sub>6</sub> were identified (Table S1).

### Immunoblot Analysis

Immunoblot assays were performed as previously reported [19]. Briefly, 10 µg of total proteins were incubated with sample buffer, boiled for 10 min, and separated in 10% Bis-Tris gels. Samples were transferred to nitrocellulose membranes, blocked with 5% skimmed milk and 0.1% Tween 20 in TBS, and then incubated with primary antibody diluted in the same buffer. After washing and incubation with an enzyme-conjugated secondary antibody, proteins were visualized with the SuperSignal West Pico Chemiluminescent Substrate (Pierce, Thermo Fisher Scientific Inc., Rockford, IL, USA) and autoradiography. Controls included the omission of the primary antibody, the use of an unrelated antibody, or assays using non-transfected cells.

### Computational Prediction Methods

InterProScan (<http://www.ebi.ac.uk/Tools/pfa/iprscan/>) and the HMMPred (<http://toolkit.tuebingen.mpg.de/hhpred/>) programs were used for protein signature. Signal peptide prediction was determined using the PSORTII (<http://psort.hgc.jp/form2.html>), Phobius (<http://phobius.sbc.su.se/cgi-bin/>), and SecretomeP 2.0 (<http://www.cbs.dtu.dk/services/SecretomeP/>) programs. The program used for transmembrane domain prediction were TMPRED ([http://www.ch.embnet.org/cgi-bin/TMPRED\\_form\\_parser](http://www.ch.embnet.org/cgi-bin/TMPRED_form_parser)), SOSUI ([http://bp.nuap.nagoya-u.ac.jp/sosui/cgi-bin/adv\\_sosui.cgi](http://bp.nuap.nagoya-u.ac.jp/sosui/cgi-bin/adv_sosui.cgi)), DAS (<http://www.sbc.su.se/miklos/DAS/tmdas.cgi>) SPLIT (<http://split.pmfst.hr/split/4/outline/>), TMHMM (<http://www.cbs.dtu.dk/cgi-bin/>), MEMSAT, (<http://bioinf.cs.ucl.ac.uk/psipred/>), and Phobius (<http://phobius.sbc.su.se/constrained.html>).

### Immunofluorescence Assay

Trophozoites were washed with PBSm (1% growth medium in PBS, pH 7.4) and allowed to attach themselves to slides at 37°C. After fixation with 4% formaldehyde, the cells were washed and blocked with PBS containing 10% normal goat serum and 0.1% Triton X-100. The cells were then incubated with specific Abs in PBS containing 3% normal goat serum and 0.1% Triton-X100, followed by incubation with Alexa488-conjugated goat anti-mouse secondary antibody. For direct double staining, the anti-HA mAb (Sigma, St. Louis, MO) was labeled with Zenon Alexa Fluor 488 and was used to detect HA-tagged GIVps (final dilution of anti-HA 1:500), while 9C9, 2F5 and anti-V5 mAbs were labeled with Zenon Alexa Fluor 555 (1:200 final dilution), following the suggested protocol (Zenon Tricolor Mouse IgG1 Labeling Kit, Molecular Probes, Invitrogen Corporation, Carlsbad, CA). Controls included the omission of the primary antibody and the staining of wild-type cells. Finally, preparations were washed and mounted in Vectashield mounting medium. Fluorescence staining was visualized with a motorized FV1000 Olympus confocal microscope (Olympus UK Ltd, UK), using 63× or 100× oil immersion objectives (NA 1.32). The fluorochromes were excited using an argon laser at 488 nm and a krypton laser at 568 nm. DAPI was excited with ultraviolet light using a 364 nm Argon laser. Detector slits were configured to minimize any cross-talk between the channels. Differential interference contrast images were collected simultaneously with the fluorescence images, by the use of a transmitted light detector. Images were processed using FV10-ASW 1.4 Viewer and Adobe Photoshop 8.0 (Adobe Systems) software. The colocalization and deconvolution were performed using MetaMorph software (Molecular Devices, Silicon

Valley, CA). Fluorescent images were observed with an inverted microscope (Carl Zeiss Axiovert 35M) equipped with epifluorescence and differential interference contrast (DIC) optics using a 100× oil immersion objective (Carl Zeiss) and were captured under regular fluorescence microscopy with a silicon-intensified target camera (SIT-C2400; Hamamatsu Phototonics, Bridgewater, NJ). The images were digitized directly into a Metamorph/Metafluor Image Processor (Universal Imaging Corporation, West Chester, PA).

### Quantitative colocalization analysis (QCA)

Confocal immunofluorescence microscopy and quantitative colocalization analysis were performed using Fiji image processing package (<http://fiji.sc/wiki/index.php/Fiji>). Background was corrected using the threshold value for all channels to remove background and noise levels completely. The Pearson's correlation coefficient (PC) and the overlap coefficient according to Manders (M) were examined. PC values range between -1.0 and 1.0, where 0 indicates no significant correlation and -1.0 indicates complete negative correlation. The M values are in the range from 0 to 1.0. If the image has overlap coefficient 0.5, it implies that 50% of both its objects, i.e. pixels, overlap. A value of zero means that there are no any overlapping pixels. This coefficient is not sensitive to the limitations of typical fluorescence imaging [27,28,29,30]. According to the PC, the values indicating colocalization ranged from 0.5 to 1.0 while for the M colocalization is considered in the range from 0.6 to 1.0.

### Reverse transcription polymerase chain reaction (RT-PCR)

The total RNA from wild-type cells was isolated using Trizol reagent (Invitrogen), and a second purification was performed using the SV Total RNA Isolation System (Promega). RT-PCR was performed using One-step RT-PCR kit (Qiagen, Valencia, CA) as previously described [14]. For detection of endogenous *glvps* mRNA, the F1 and R1 primers were used to amplify the 1653 nt ORF, while the primers F2 (ATGAGCTGGCTCAA-GAGTATGGTAGGACTGC) and R1 were used to obtain the 1490 nt fragment (from the 160 nt to the stop codon). The expression of the constitutive glutamate dehydrogenase enzyme (GDH) using previously described primers GDHf/GDHR [19] was performed for positive control. The DNA-contamination control was performed by adding the same primers at the PCR step of the RT-PCR reaction. These assays were performed three times in duplicate. For semi-quantitative RT-PCR, total RNA extracted from antisense transgenic trophozoites or trophozoites control containing empty vector, was diluted serially from 20 ng to 0.2 ng per reaction in a final reaction volume of 50 µl, and RT-PCR was carried out following the manufacturer's instructions. For the examination of µ1 downregulation, µ1 antisense and sense were amplified using the primers described in Touz et al. [13]. For *glvps* antisense amplification, the oligonucleotide ASf and ASr were added sequentially. For *glvps* sense amplification, F1 and R1 primers were added to OneStep the master mix. *acph* mRNA was determined using the primers described in [13]. Data normalization was carried out against the *gdh* endogenous reference gene transcript.

### Subcellular fractionation

Trophozoites were grown to logarithmic phase and washed twice in PBS, resuspended in cold hypotonic lysis buffer (10 mM TRIS-HCl, pH 7.5 plus protease inhibitors) and then incubated on ice for 5 min. The cell lysate was centrifuged in a refrigerate microfuge at 16 000x g at 4°C for 10 min. The pellet fraction was washed once with cold hypotonic lysis buffer, resuspended in

sample buffer and incubated on ice for 25 min prior to taking for SDS-PAGE. Equivalent amounts of supernatant (SN), washing (W) and pellet (P) fractions were analyzed by immunoblotting [31].

### Digitonin or Triton X-100 Cell Permeabilization Followed by Digestion with Proteinase K (PK)

In tubes: GIVps-HA and wild-type trophozoites were collected and permeabilized, using either 0.1% of digitonin or 0.1% of Triton X-100 in PBS for 10 min on ice. After washing with PBS, the cells were treated with 5  $\mu$ g/ml of proteinase K (PK) for 30 min on ice. Samples were inactivated by the addition of 1 mM phenylmethylsulfonyl fluoride (PMSF), treated with SDS-PAGE buffer, heated to 95°C, and cooled on ice. Samples were separated by SDS-PAGE before testing by immunoblotting. In slides: GIVps-HA and wild-type trophozoites were collected and attached to Poly-L-Lysine-covered slides at 37°C. After fixation with 4% formaldehyde, the cells were permeabilized by addition of 0.1% digitonin in PBS (Calbiochem). After two washes with PBS buffer, the trophozoites were treated for 5 min with varying concentrations of PK at 37°C. To terminate the PK reaction, 5 mM PMSF was added to all samples. The cells treated with PK were then incubated with specific Abs in PBS containing 3% normal goat serum and 0.1% Triton-X100, followed by incubation with Alexa488-conjugated goat anti-mouse secondary antibody. Controls included treatment with 0.1% of Triton X-100 or digitonin and Ab detection in PBS and PK treatment of non-permeabilized cells. After PBS washing, the samples were analyzed by IFA as described below.

### Yeast-two hybrid assay

The MATCHMAKER Two-Hybrid System was used following the manufacturer's recommended protocol (Clontech, Palo Alto, CA). The two-hybrid pGADT7-Rec(LEU2) vector (GAL4 transcription activation domain; AD) containing the sequences for *glvps* or  $\Delta$ *glvps* (lacking the YQII motif sequence) were used as bait, while *acph* and  $\mu$ 1 genes were inserted into the pGBKT7(TRP1) vector (GAL4 DNA binding domain; BD), yielding the pGIVps-AD, pGIVps<sub>YQII</sub>-AD, pAcPh-BD, and p $\mu$ 1-BD vectors, respectively. The vectors pLRP-HA and p $\mu$ 1-BD were used as control [32]. The AH109 transformants were cultured at 30°C for 4–5 days on plates with minimal medium lacking leucine and tryptophan (-L/-T) to test for positive transformation, or in the absence of leucine, tryptophan, and histidine (TDO, triple dropout medium) to study specific protein interactions as previously described [13]. High-stringency medium that also lacked adenine (QDO) was also used to test strong protein-protein interactions. Controls included the pESCP-AD/p $\mu$ 1-BD interaction or pGILRP-AD/p $\mu$ 2-BD (protein-protein interaction control) [13,32] and the pGIVps-AD/ pGBKT7 or pGADT7/ pGIVps-BD vector (autoactivation control).

## Results

### The subcellular localization of the soluble hydrolase AcPh

The localization of AcPh in the ER and PVs was in part determined by using diverse methodologies [11,13]. In the present work, we aimed to acutely define the subcellular localization of AcPh together with its activity by a combination of complementary assays.

First, we constructed a C-terminus tagged AcPh containing a sequence that codified for a V5 epitope followed by six consecutive His (Figure 1A). Trophozoites transfected with the vector pTubAcPh-V5/H6pac were grown in culture medium, and subcellular distribution of AcPh-V5/H6 was analyzed by immu-

nofluorescence. In agreement with previous reports on the enzyme cytochemical [11,33] and HA-tagged AcPh localization [13], AcPh-V5/H6 was observed around the nuclei and close to the plasma membrane (Figure 1B). To assess where AcPh became active inside the cells, we used a phosphatase substrate ELF<sup>®</sup> 97, successfully used for the detection of acid and alkaline phosphatase activity by fluorescence microscopy [23,24,25,26]. Fluorescence was observed upon substrate hydrolysis, producing a bright and photo-stable yellow-green fluorescent precipitate at the site of enzyme activity. This fluorescence accumulated in the PVs at pH 5.5 but was not detected at pH  $\geq$ 7.0 (Figure 1C). Also, acid phosphatase activity was observed in the structure termed bare zone (BZ), located between both nuclei and suggested to be important in trophozoite attachment/detachment [34]. Recently, we found that it is composed by PV-like vacuoles (Touz et al., unpublished results). No difference in the fluorescence signal was

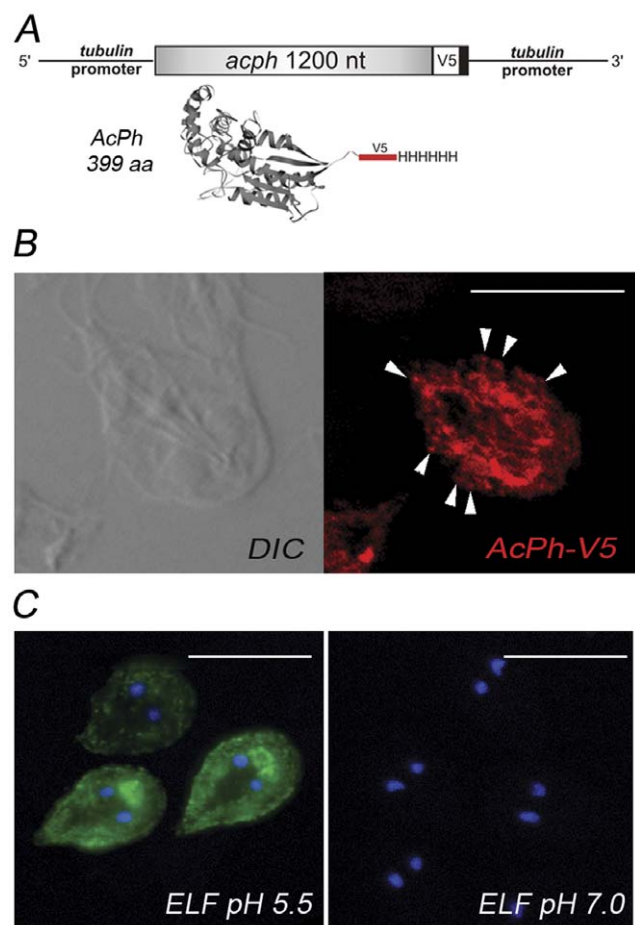

**Figure 1. AcPh localization and activity.** (A) Schematic representation of the *acph* gene containing the GGTAAGCCTATCCCTAACCTCTCCTCGGTCTCGATTCTACGCGTA. CCGGT and CATCATCATCATCAT, coding to the V5 epitope and six histidine residues, respectively. A 3D reconstruction of the gene product tagged with V5-H6 using the hidden Markov models (HMMs) [84] and MODELLER [85] is also represented. (B) IFA and confocal microscopy show AcPh-V5 predominantly in the ER but also in the nuclear envelope and PVs (arrowheads). DIC: Differential interference contrast microscopy. (C) Acid phosphatase activity on the PVs and bare zone is observed by using the specific substrate ELF97 at pH 5.5. Alkaline phosphatase activity was not detected in trophozoites at pH  $\geq$ 7.0. Nuclear DNA was labeled with 4',6-diamidino-2-phenylindole (DAPI) (blue). Bar, 10  $\mu$ m. doi:10.1371/journal.pone.0043712.g001

observed between AcPh-V5/H6 transgenic and wild-type trophozoites in these assays (not shown).

Detailed AcPh-V5/H6 localization was obtained using immunoelectron microscopy of transgenic trophozoites (Figure S1). An illustrative electron micrograph of a *Giardia* trophozoite was shown to better describe the PVs and BZ (Figure S1A) [11,35]. Labeling with anti-V5 mAb and the gold-labeled secondary antibody showed a distinctive signal, consistent with the localization of AcPh in these organelles (Figure S1B, C). No labeling was observed in treated wild-type trophozoites (Figure S1A, a). Altogether, these results suggested that, after synthesis in the ER, AcPh was delivered to the acidic compartment where it became active.

### Identification of the acid phosphatase receptor

The awareness that the soluble lysosomal protein AcPh might require a receptor-mediated sorting process, prompted us to initiate a search for a candidate using AcPh as bait. This result encouraged the use of AcPh-V5/H6 transgenic trophozoites to purify AcPh together with its associated proteins by pull-down assay. AcPh-V5/H6 was purified from transgenic cells using agarose-immobilized nickel ions that bound the string of histidine residues of AcPh. Linked proteins were eluted, analyzed by SDS-PAGE, and submitted to the Research Technologies Branch for Protein Identification (NIAID, NIH) for LC-MS/MS analysis. After three independent experiments, three proteins associated with AcPh were identified (Figure 2A, B and Table S1). Besides the identification of two protein bands corresponding to the AcPh, BLAST search and sequence analysis identified proteins involved in protein trafficking, including a sequence encoding to the kinesin-like protein (GL50803\_14070), the Vacuolar protein sorting 35 (GL50803\_23833), and a sequence corresponding to an hypothetical protein (GL50803\_28954). Analysis of homologous sequences of GL50803\_28954 using the different predictive programs did not provide information about the possible function of this protein. However, analysis of the protein sequences of 550 amino acids showed that this protein contained a lysosomal tyrosine-based motif YQII at its C-terminus, suggesting that it might be the receptor involved in binding and transport of AcPh to PVs in *Giardia*.

Analysis of its expression by RT-PCR showed that GL50803\_28954 was expressed in growing trophozoites (Figure 3A). Because at that time the corresponding gene sequence was deprecated from the GDB, we decided to corroborate the start codon of the protein sequence by designing a set of primers that amplified a fragment of 1490 bp (from the ATG<sub>160-162</sub>) and another pair to amplify the whole predicted 1653 bp ORF (Figure 3A). These results clearly show that the putative ORF was expressed in the *Giardia* trophozoite assemblage A. Further, this assemblage A gene was undeprecated, based on synteny to assemblage B and E genomes. Immunoblotting revealed the expected band of around 60 kDa and a high band of around 120 kDa, suggesting that this fusion protein might form homodimers (Figure 3B) (see discussion). Immunofluorescence assays of constitutively expressed C-terminus HA-tagged GL50803\_28954 showed this protein surrounding the nuclei and also close to the plasma membrane (Figure 3C).

### Topological analysis of GL50803\_28954

Biostatistics analysis using Interproscan [36] showed sequence similarity between GL50803\_28954 residues 240–482 and WD40 repeat-like superfamily SSF50978, which includes proteins possessing a fold of seven 4-stranded beta-sheet motifs (E-value of 2.7E-10). A secondary structure analysis using Jpred3 [37] concordantly predicts an abundance of residues with likelihood to

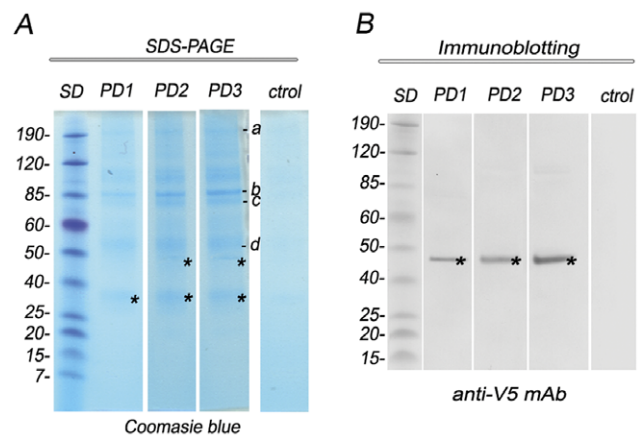

**Figure 2. AcPh-V5H<sub>6</sub> pulled-down associated proteins.** (A) SDS-PAGE stained with Coomassie blue for total protein shows AcPh-V5H<sub>6</sub>-binding proteins from transgenic trophozoite extracts identified by affinity chromatography and mass spectrometry. PD1-3 are independent pull-down assays. The proteins identified are shown as: **a**: not determined; **b**: kinesin-like protein (GL50803\_14070, GL50803\_17264); **c**: Vacuolar protein sorting 35 (GL50803\_23833); **d**: unknown protein (GL50803\_28954). Asterisks (\*) denote detection of AcPh. Control lane (Ctrl) shows no protein binding when wild-type trophozoites were used. (B) Immunoblotting shows the presence of AcPh-V5H<sub>6</sub> in PD1-3 but not in control. Asterisks (\*) denote detection of AcPh-V5H<sub>6</sub> by using anti-V5 mAb. Molecular weights of protein standards (SD) in kDa are shown on the left.

doi:10.1371/journal.pone.0043712.g002

form beta propellers in that residue stretch. HHPred also predicts similarity to WD40 repeat-like motif present in PDB entry 3emh with a probability of 91.4% and E-value of 6.4E-05. Sequence analysis using Phobius [38] indicates that this protein contains no N-terminal cleavable signal peptide to direct protein topology in the membrane. Regarding to the absence of a signal peptide in this protein, membrane proteins confined to sub-regions such as the smooth ER may be retained by forming oligomeric assemblies [39,40]. Consequently, such proteins may not need structural retention motifs [41]. We expect that GIVps follows a mechanism where membrane proteins confined to sub-regions such as the smooth ER may be retained by forming oligomeric assemblies to enter to the secretory pathway. We also tested whether GIVps can be exported without a classical N-terminal signal peptide using the sequence based method SecretomeP 2.0, for prediction of mammalian and bacterial secretory proteins targeted to the non-classical secretory pathway. This method was also capable of identify GIVps as a protein that follows a signal peptide independent secretion pathway with a NN-score of 0.791 (non-classically secreted proteins should obtain an NN-score exceeding the normal threshold of 0.5) [42,43].

Besides Phobius, numerous topology-predicting algorithms identified two hydrophobic motifs (H1, residues 143 to 167; H2, residues 526 to 542) as potential TM domains, suggesting that GL50803\_28954 utilizes these motifs as signal-anchor sequences to direct a polytopic membrane topology. However, these algorithms disregard the presence of charged D and R residues inside H1, making this region an uncertain membrane domain. On the other hand, it was extensively shown that positively charged residues are commonly observed at the end regions of transmembrane helices, particularly on the cytoplasmic side [44,45,46], as is the case for the R<sub>543</sub> flanking H2. Moreover, H2 is preceded by two conserved aspartate residues (D<sub>523</sub>, D<sub>526</sub>), probably acting as TM-stop for luminal phase, indicating the

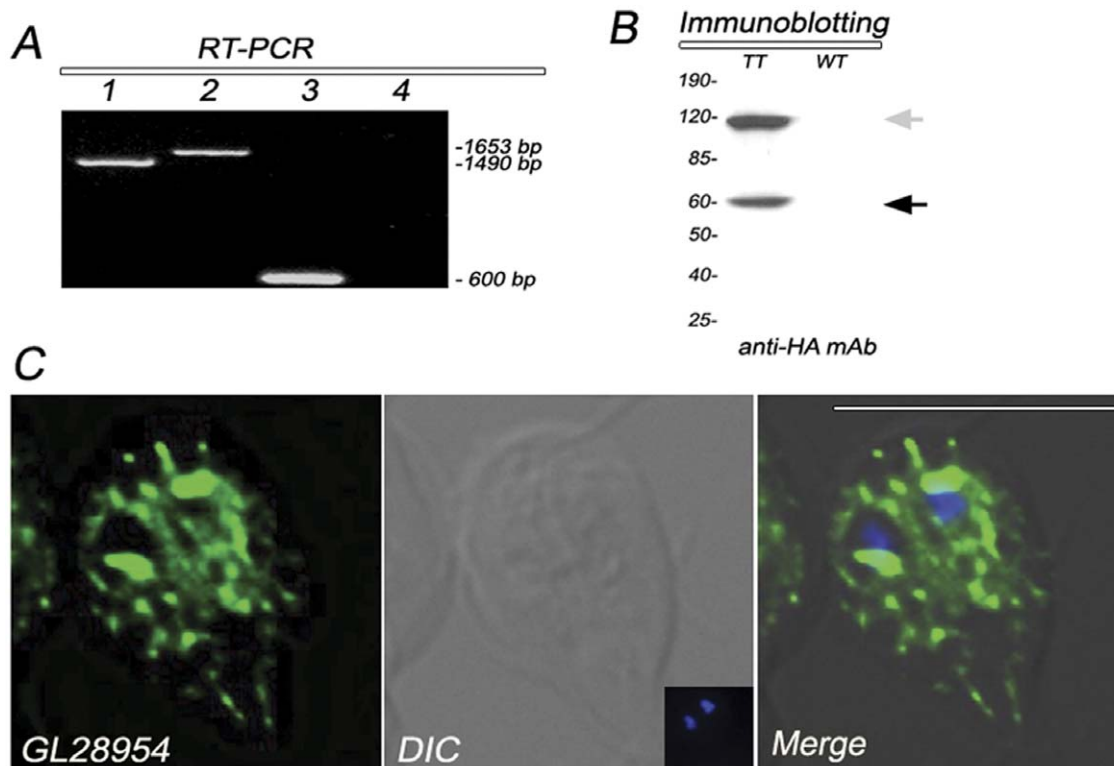

**Figure 3. Expression of GL28954.** (A) RT-PCR experiment show that the mRNA of GL28954 is expressed as predicted by the GiardiaDB. **1:** fragment of 1490 bp amplified using the primer pair F2/R1; **2:** the predicted 1653 bp ORF amplified using the primer pair F1/R1; **3:** expression of a *gdh* mRNA fragment was tested as positive control; **4:** DNA-contamination control. (B) Immunoblotting using anti-HA mAb shows the predicted band of 60 kDa for GL28954 (black arrow) but also a higher 120 kDa band that might correspond to GL28954 homodimer (gray arrow) in transgenic trophozoites (TT). Wild-type trophozoites (WT) do not show the presence of GL28954-HA. Relative molecular weights of protein standards (kDa) are indicated on the left. (C) IFA and confocal microscopy show the HA-tagged GL28954 mainly around the nuclei. DIC: Differential interference contrast microscopy. Nuclear DNA was labeled with DAPI (blue). Bar, 10  $\mu$ m. doi:10.1371/journal.pone.0043712.g003

importance of amphiphilic residues for stabilization of transmembrane helices at the membrane-water interphase [47]. Since the WD40 repeat motif should face the luminal site and the H2 is consistent with the “positive-inside rule” of membrane protein topology, we predicted an  $N_{\text{luminal}}/C_{\text{cytoplasmic}}$  orientation of this protein, with the YQII exposed to the cytosol (Figure 4A). Running Phobius with the restriction that the portion containing the WD-40 motif should be luminal, the probability for GIVps  $N_{\text{luminal}}/C_{\text{cytoplasmic}}$  orientation is from 0.8 to 1 with a probability  $>0.75$  being significant [48]. This predicted topology would be similar to PEP1 (*vps10p*) topology, which displays a large luminal domain containing several BNR (bacterial neuraminidase repeat) that form a beta propeller domain, a transmembrane domain, and a short cytoplasmic tail displaying an adaptin interaction motif [5,49,50]. Thus, we named this protein *Giardia lamblia* Vacuolar protein sorting (GIVps).

An initial subcellular fractionation using hypotonic lysis of GIVps-HA transgenic trophozoites indicated that GIVps was present as a membrane-associated population similar to the type-I membrane protein VSP1267 (Figure 4B). Further studies using epitope-tagging of GIVps at the C-terminus and proteinase K (PK) protection assay confirmed a bitopic  $N_{\text{luminal}}/C_{\text{cytoplasmic}}$  topology. This assay uses the restricted proteolytic digestibility of proteins to reveal the intramembrane orientation of proteins residing in organelles as diverse as the Golgi apparatus, the ER, peroxisomes, mitochondria, among others [51]. As shown in Figure 4C, the intact, the luminal (ER)-resident chaperone BiP/GRP78 was

protected by ER-microsomal membranes when treated with digitonin (which selectively permeabilized the plasma membrane) and proteinase K (Figure 4C, lane 3, lower panel), while the HA epitope of GIVps-HA was not (Figure 4C, line 3, upper panel). GIVps-HA transgenic and wild-type cells, permeabilized by 1% Triton X-100 without addition of PK, were used for proteolysis control (Figure 4D, Tx100). No obvious reduction in size of the GIVps-HA protein was observed. Identical results were obtained by analysis of fluorescent signals of cells permeabilized by digitonin and subsequently treated with proteinase K (Figure 4D, digitonin+PK). As expected, in both assays no signal was detected when proteinase K was used after Triton X-100 permeabilization (Figure 4C, D, Tx100+PK). Control of GIVps-HA transgenic cells permeabilized by 1% Triton X-100 or digitonin without addition of PK examined by indirect immunofluorescence, showed the presence of both proteins (Figure 4D, Tx100 – digitonin). Addition of PK alone did not present proteolytic digestibility (not shown). It was thus possible to determine that indeed the C-terminus of GIVps-HA faces the cytosol.

#### Overexpressed GIVps-HA accumulates in the ER and to some extent in the PVs

Trophozoites expressing GIVps-HA exhibited a noticeable fluorescence around the nuclei, suggesting that this receptor might be retained in the ER. An antibody against the (ER)-marker BiP [15], was employed to visualize this compartment and to perform colocalization analysis showing that BiP colocalized with GIVps-

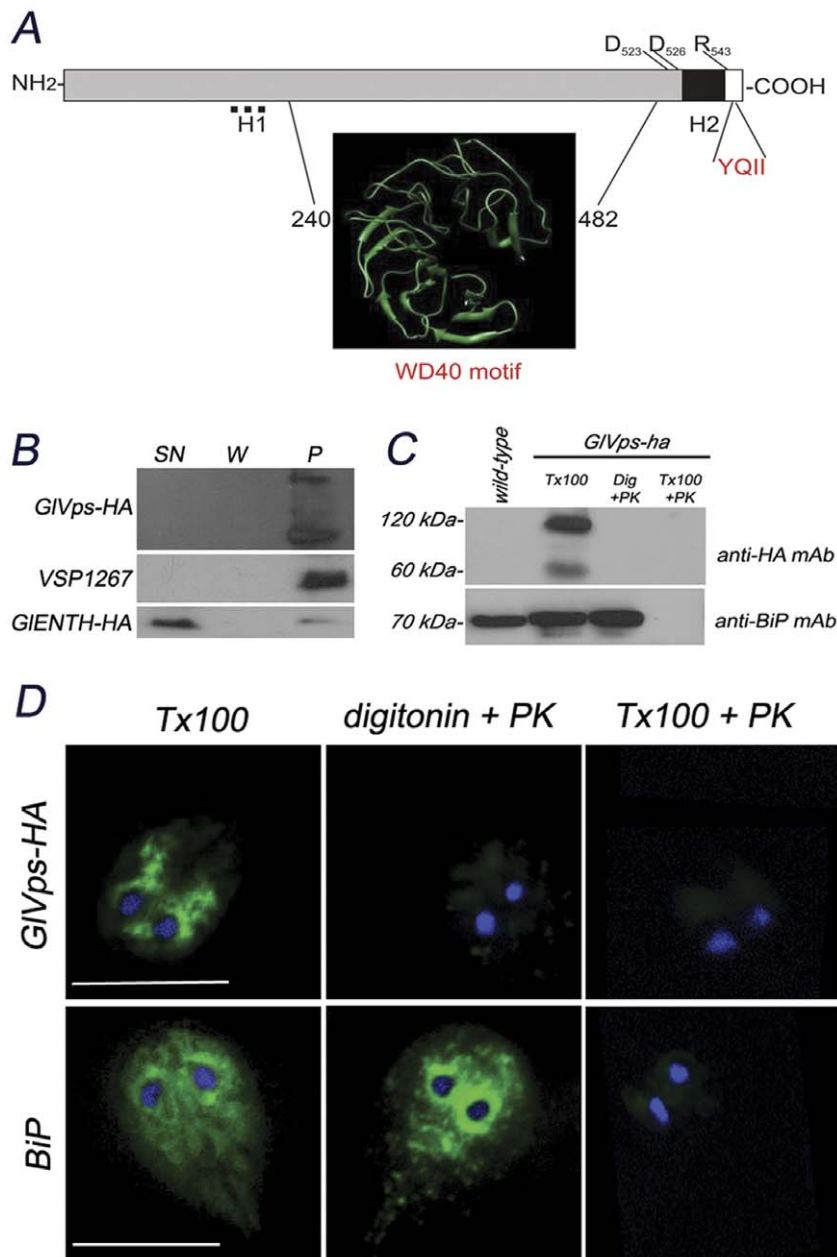

**Figure 4. The *Giardia lamblia* Vacuolar protein sorting (GIVps) topology analysis suggests an N<sub>luminal</sub>/C<sub>cytoplasmic</sub> localization.** (A) Schematic representation of GIVps. The presence of a transmembrane domain (in black) flanked by the TM-stop residues (R<sub>543</sub>, D<sub>523</sub>, and D<sub>526</sub>) is shown. The unlikely hydrophobic motif H1 (residues 143 to 167) is also depicted in dotted bar. One WD40 protein-binding domain (3D structure) between the residues 240–482 at the N-terminus (in gray) and the cytoplasmic tail (in white) containing the YQII lysosomal motif are shown in the diagram. (B) *GIVps-ha* transgenic cells were grown and lysed under hypotonic conditions. Supernatant (SN) and pellet (P) fractions were recovered, concentrated to normalize loading and analyzed by immunoblotting. GIVps-HA and VSP1267 are restricted to the membrane-bound population in the pellet (upper and middle panel). The cytosolic GIENITH-HA protein (Feliziani and Touz, unpublished results) is mainly present in the cytosolic fraction. W: soluble proteins after washing. Anti-HA mAb was used for GIVps-HA and GIENITH-HA and 5C1 mAb for VSP1267. (C) Immunoblotting after proteinase K (PK) assay shows the protection of BiP but not GIVps-HA after membrane permeabilization by digitonin (Dig+PK). Permeabilization with Triton X-100 previous to PK treatment shows both BiP and GIVps-HA degradation (Tx100+PK). Permeabilization with Triton X-100 without PK addition shows the presence of both proteins (Tx100). In these assays, wild-type trophozoites not expressing GLVps-HA and GIVps-HA transgenic cells were used. Relative molecular weights of protein standards (kDa) are indicated on the left. (D) IFA and epifluorescence microscopy after 50  $\mu$ g PK assay confirms that the C-terminal portion of GIVps is unprotected from protease, revealing the cytoplasmic orientation of its C-terminus (digitonin+PK, top panel). Conversely, the luminal ER-protein BiP was not processed by the PK (digitonin+PK, bottom panel) and was detected in the ER. Degradation of BiP and GIVps-HA was observed in the control of cells permeabilized with Triton X-100 previous PK treatment (Tx100+PK) but not in the control, where the cells were treated with Triton X-100 or digitonin without PK addition (Tx100 – digitonin). Anti-BiP or anti-HA mAb were used in the assay shown in (B) and (C) to detect BiP or GIVps, respectively. GIVps-HA transgenic cells were used in this experiment. Individual images were processed in the same way. Nuclear DNA was labeled with 4',6-diamidino-2-phenylindole (DAPI) (blue). Bar, 10  $\mu$ m. doi:10.1371/journal.pone.0043712.g004

HA in fixed cells (Figure 5A, top row). Detailed observations revealed that GIVps-HA localized in particular zones of the ER, in agreement with observations that the protein sorting station in *Giardia* might take place in distinct ER domains [52,53]. Quantitative colocalization analysis demonstrated high degree of colocalization between BiP and GIVps-HA (Figure 5A, Scatter plot on the right). Scatter plots estimate the amount of detected fluorescence based on localization of GIVps-HA (green, y-axis) and BiP (red, x-axis). Colocalized pixels (yellow) are located along the diagonal of the scatter gram. The scatter plots indicate a yellow monopartite diagonal scatter pattern, which verifies the colocalization of both proteins in the ER. This observation was supported by the results of coefficients calculations: the Pearson's correlation coefficient (PC) and the overlap coefficient according to Manders (M) were 0.861 and 0.863, respectively. Thus, the results of coefficients calculations helped to find out more about the localization of GIVps-HA than it was possible to do using morphological experiments only.

The receptor-dependent delivery of AcPh to the PVs proposed that GIVps might cycle between these sorting points to the vacuoles. Direct immunofluorescence revealed that there was only a partial colocalization of GIVps-HA with the PV marker adaptor protein 2 (AP2) in the PVs (Figure 5B). PC decreased to 0.406 with M of 0.725 showing that this partial colocalization was real (Figure 5B, Scatter plot on the right).

### The YQII motif of GIVps is required for receptor localization and interaction with AP1

The intracellular trafficking of the yeast Vps10p is mediated by its cytosolic domain [54]. This domain seems to interact with components of the lysosomal delivery system (i.e., clathrin-associated adaptor molecules Gga1p and Gga2p) to direct loaded receptors into transport vesicles destined for the endosome [55]. Similar in structure to yeast Vps10p, GIVps is an integral membrane protein but with a short RTVYQIIIV carboxy-terminal amino acids exposed to the cytoplasm. To examine the functional requirement of GIVps' cytoplasmic domain, a mutant was constructed in which a stop codon was inserted into the sequence

of GIVps after nucleotide 1634. This resulted in the production of a truncated GIVps protein lacking the YQII lysosomal motif but leaving the transmembrane domain intact, including a few charged amino acids on the cytoplasmic side of the membrane to properly anchor the protein. This new GIVps<sub>YQII</sub>-HA construct was introduced in wild-type trophozoites yielding the *GIVps<sub>YQII</sub>* transgenic cells. A significant amount of this mutant was detected at the cytoplasm in a punctate pattern (Figure 6A). Conversely to GIVps-HA, GIVps<sub>YQII</sub>-HA was not retained in the ER as shown by the double immunostaining using anti-BiP and anti-HA mAbs (Figure 6B). The coefficients  $P = -0.124$  and  $M = 0.093$  indicated no colocalization between BiP and GIVps<sub>YQII</sub>-HA in fixed trophozoites (Figure 6B, Scatter plot on the right). Labeling of GIVps<sub>YQII</sub>-HA is observed in the PVs (Figure 6C). Colocalization analysis between GIVps<sub>YQII</sub>-HA and AP2 showed a moderated degree of colocalization with  $P = 0.134$  and  $M = 0.501$ . These observations indicate that the YQII residues affected GIVps trafficking. When *GIVps10*, wild-type, and *GIVps<sub>YQII</sub>* trophozoites were analyzed by immunoblotting, degradation of the mutant receptor GIVps<sub>YQII</sub>-HA was observed (Figure 6D). To analyze whether the expression of the transgenic cells affected *Giardia* growth, time-course curves were performed using *GIVps10*, wild-type, and *GIVps<sub>YQII</sub>* cells and no significant effect or cell deterioration was observed at 48 h of culturing (not shown).

We recently showed that transport along the vacuolar pathway requires clathrin and the adaptors AP1 or AP2, with AP1 being involved in the forward lysosomal protein trafficking to the PVs, while AP2 participates in endocytosis [56]. Unlike yeast and mammalian cells, *Giardia* does not contain GGAs homologous proteins, making AP1 the primary candidate for GIVps transport. To analyze whether AP1 is involved in GIVps trafficking, *dsRNA- $\mu$*  transgenic trophozoites [13] were cotransfected with the plasmid expressing GIVps-HA. Thus, we were able to analyze the expression and localization of GIVps-HA in trophozoites containing the  $\mu 1$  subunit of AP1 (+ $\mu 1$ ) and in trophozoites expressing a reduced amount of  $\mu 1$  (- $\mu 1$ ). Densitometric analysis of RT-PCR experiments showed that, when these trophozoites were induced with 10  $\mu\text{g/ml}$  of tetracycline, the  $\mu 1$ -antisense

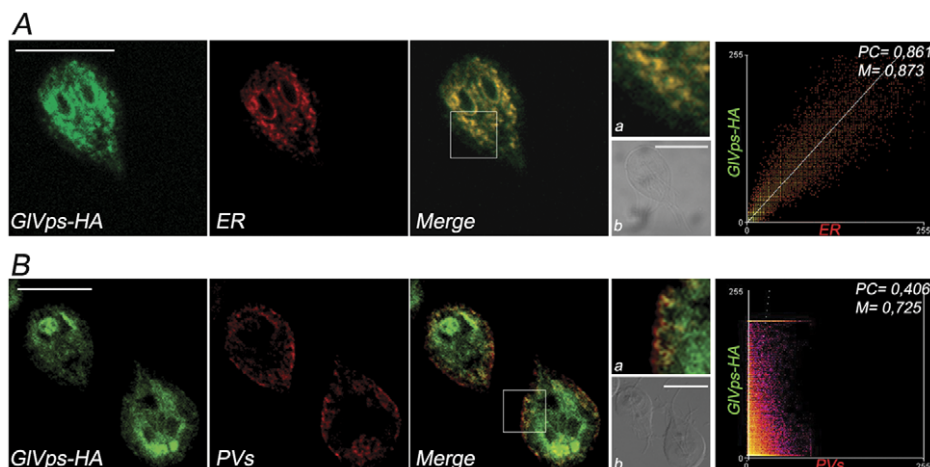

**Figure 5. Subcellular distribution of GIVps.** (A) Direct IFA and confocal microscopy show that GIVps-HA (green) partially colocalizes with the ER-resident chaperone BiP (red) in the ER (Merge in yellow). Inset magnifies a region of the cell and shows the green and red fluorescence in the ER (a). Differential interference contrast microscopy (b) is shown as insert. Scatter plot of the two labels confirms the colocalization (right panel). (B) Direct IFA and confocal microscopy using the 2F5 mAb that detect the  $\mu 2$  subunit of AP2 in the PVs (red) and anti-HA mAb to detect GIVps-HA (green), show the presence of GIVps-HA in some PVs. Inset magnifies a region of the cell where the green and red fluorescence partially overlap (a). Differential interference contrast microscopy (b) is shown as insert. Bar, 10  $\mu\text{m}$ . Scatter plot (panel on the right) correspond to the colocalization analysis. Pearson's coefficient (PC). Manders' Overlap coefficient (M). doi:10.1371/journal.pone.0043712.g005



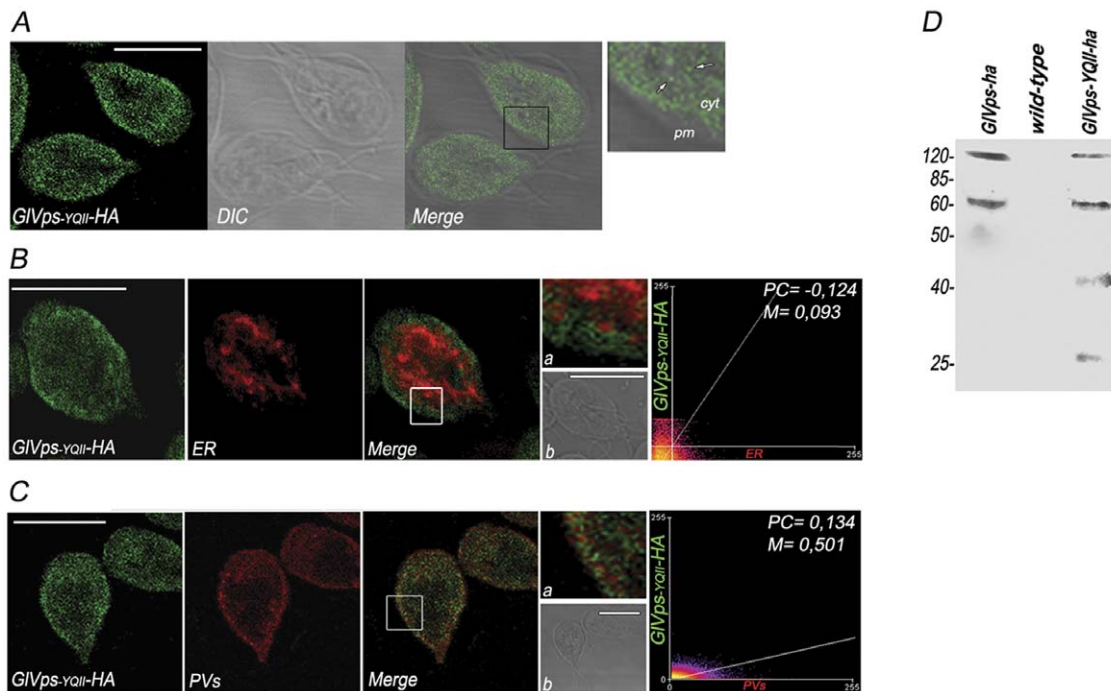

**Figure 6. The YQII motif of GIVps contributes to receptor stabilization.** (A) GIVps<sub>YQII</sub>-HA (green) is observed in the cytosol (cyt) of trophozoites probable in small vesicles (white arrows in insert) by IFA and confocal microscopy. pm: plasma membrane. (B) GIVps<sub>YQII</sub>-HA (green) do not colocalizes with BiP (red) in the ER (Merge). Inset (a) magnifies a region of the cell and shows that the green and red fluorescence are well separated. Differential interference contrast microscopy (b) is shown as insert. Scatter plot (panel on the left) correspond to the colocalization analysis. (C) Partial colocalization of GIVps<sub>YQII</sub>-HA (green) and  $\mu$ 2 (red) is observed in the PV region (Merge). Inset (a) magnifies a region of the cell where the green and red fluorescence partially overlap in the PVs. Differential interference contrast microscopy (b) is shown as insert. Bars, 10  $\mu$ m. Scatter plot of the two labels shows the colocalization (left panel). Pearson's coefficient (PC). Manders' Overlap coefficient (M). (D) GIVps-HA and GIVps<sub>YQII</sub>-HA are detected by immunoblotting using anti-HA mAb in *GLVps-ha*, *GLVps-YQII-ha* trophozoites, respectively. No detection of these receptors was observed in wild-type cells. Proteolytic processing is observed for GIVps<sub>YQII</sub>-HA in comparison with GIVps-HA. Relative molecular weights of protein standards (kDa) are indicated on the left. doi:10.1371/journal.pone.0043712.g006

RNA was present in  $-\mu$ 1 but not in  $+\mu$ 1 or wild-type (wt) cells (Figure 7A). Furthermore, a significant reduction of the endogenous  $\mu$ 1 was observed in  $-\mu$ 1 trophozoites compared with  $+\mu$ 1 or wt cells when the 3' endogenous segment of  $\mu$ 1 was tested [13], supporting our previous results showing that production of  $\mu$ 1-dsRNA successfully diminished the transcript levels of  $\mu$ 1 mRNA (Figure 7A). No alteration on the *glc3p* mRNA expression was observed between the  $-\mu$ 1,  $+\mu$ 1 or wt cells (Figure 7A). However, IFA and confocal microscopy showed that GIVps-HA was present as a distinctive punctuate pattern in  $-\mu$ 1 cells whereas the perinuclear/reticular localization of GIVps-HA in  $+\mu$ 1 cells was conserved (Figure 7B). Immunoblotting showed that degradation of the receptor GIVps-HA occurred in the transgenic  $-\mu$ 1 cells (Figure 7C, line b) when compared with  $+\mu$ 1 cells (Figure 7C, line a) and differed from the processing observed for GIVps<sub>YQII</sub>-HA in cells containing  $\mu$ 1 (Figure 7C, line c and Figure 6D). Evidence of an interaction between the GIVps and AP1 was obtained in the yeast two-hybrid system (YTH). Initial analysis demonstrated that GIVps strongly interacted with  $\mu$ 1 (Figure 7D, top panels). Moreover, GIVps<sub>YQII</sub> (lacking the lysosomal YQII sorting motif) provided no response (Figure 7D, left panels). When the interaction between GIVps and  $\mu$ 2 was tested, no positive results were obtained (Figure 7D, right panels). Altogether these results suggest that GIVps protein trafficking depends on its tyrosine-motif, which is capable of binding AP1 but not AP2 for this purpose.

### GIVps is the presumed AcPh receptor

When GIVps-HA was co-expressed with AcPh-V5 and analyzed with IFA and confocal microscopy, we observed that GIVps-HA and AcPh-V5 colocalized around the nuclei and also in some PVs (Figure 8A). Correlation values ( $P = 0,716$  and  $M = 0,824$ ) indicate a significant degree of colocalization for both proteins. To test directly for the association of GIVps and AcPh, we performed yeast two-hybrid assays. After co-transformation and colony growth assays, we observed that GIVps and GIVps<sub>YQII</sub> certainly interacted with AcPh, allowing the yeast reporter to grow in stringent growth medium (Fig 8B). However, this interaction seemed not to be strong, since no colonies were obtained in high-stringency growth medium. These results, in addition to the pull-down findings, suggest that GIVps and AcPh interact and may be transported together toward the PVs. The role of GIVps in transport was further tested by inhibition of GIVps expression by antisense production. Semiquantitative reverse transcription-PCR revealed an increase of the GIVps-antisense RNA production as well as a fivefold decrease in GIVps-sense RNA analysis compared with control containing empty vector (Figure 9A). No variation on the native *acph* mRNA was observed when GIVps was depleted (Figure 9A). To test the effect of GIVps down-regulation in the localization and activity of AcPh the phosphatase substrate ELF<sup>®</sup>97 was used. We observed that the activity of AcPh was dramatically reduced in *GIVps-antisense* transgenic trophozoites compared with control containing empty vector (Figure 9B). These data suggested that GIVps participates in the transport of AcPh to

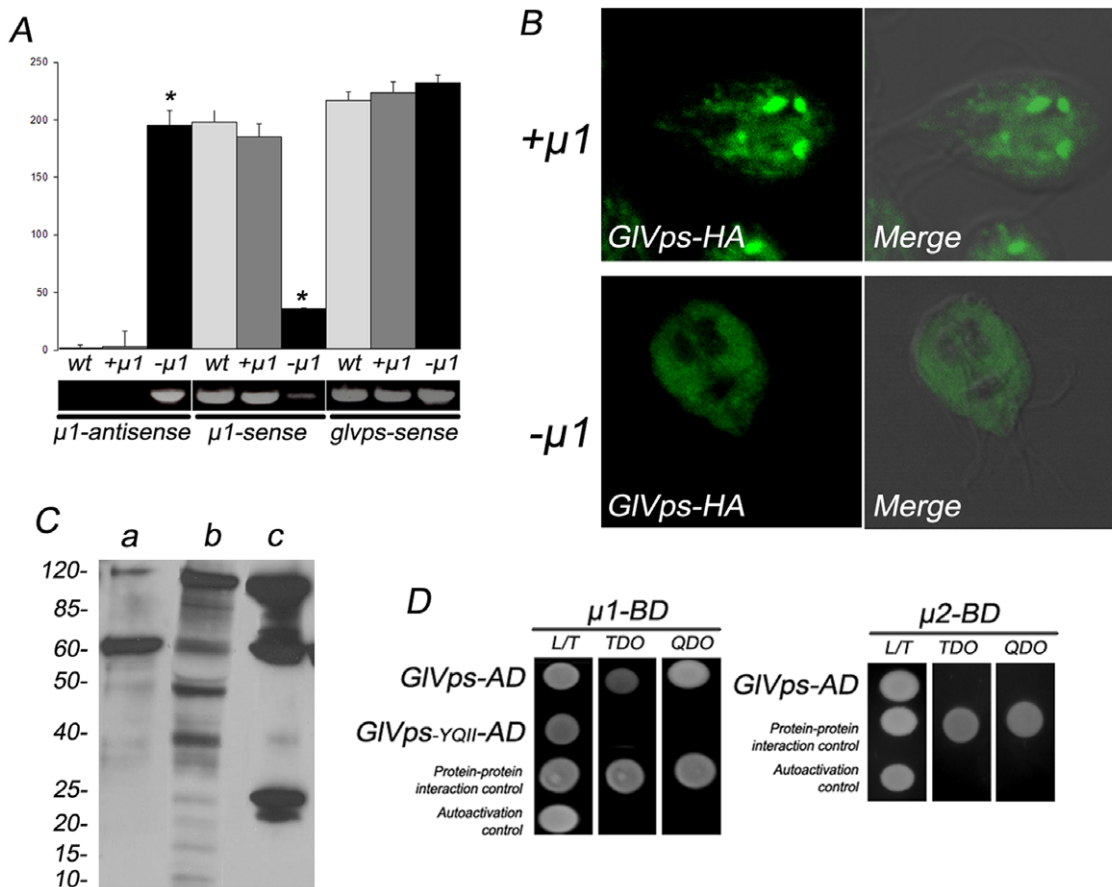

**Figure 7. GIVps and the medium subunit of AP1 interact via the YQII motif.** (A) Densitometric assessment of one representative RT-PCR experiment shown on bottom. The amount of 1000 nt antisense RNA from the vector is only observed in  $-\mu 1$  trophozoites. Reduction of endogenous  $\mu 1$  mRNA levels is observed in  $-\mu 1$ , but not in  $+\mu 1$  or wild-type cells (wt). Similar expression of *glvps* mRNA in wild-type,  $+\mu 1$  and  $-\mu 1$  cells was observed. (\* $p < 0.0001$ ). (B) GIVps-HA is observed in the cytoplasm in  $\mu 1$ -depleted cells. In cell expressing  $\mu 1$  ( $+\mu 1$ ), GIVps-HA possesses a reticular-perinuclear distribution. Merge panels of green fluorescence and differential interference contrast microscopy for  $+\mu 1$  and  $-\mu 1$  trophozoites are shown. Bar, 10  $\mu\text{m}$ . (C) GIVps-HA is detected by immunoblotting using anti-HA mAb in  $+\mu 1$  (a) and  $-\mu 1$  (b) trophozoites. The proteolytic processing of GIVps-HA observed in  $-\mu 1$  trophozoites, differs from the processing of GIVps-YQII-HA in cells expressing  $\mu 1$  (c). Relative molecular weights of protein standards (kDa) are indicated on the left. (D) The yeast two-hybrid assay demonstrates that GIVps (GIVps-AD) but not GIVps-YQII (GIVps-AD lacking the lysosomal motif) interacts with  $\mu 1$  ( $\mu 1$ -BD) (left panel). GIVps (GIVps-AD) does not interact with the  $\mu 2$  subunit of AP2 ( $\mu 2$ -BD) (right panel). Interaction is noticed by the growth of yeast colonies in plates lacking tryptophan, leucine and histidine [TDO (triple-dropout medium) plates] and in the high-stringency medium that also lacked adenine (QDO). Controls of the methodology include testing of pESC-AD/ $\mu 1$ -BD or pGILRP-AD/ $\mu 2$ -BD (protein-protein interaction) and pGIVps-AD/pGBKT7 (autoactivation). doi:10.1371/journal.pone.0043712.g007

the PVs where the enzyme became active. To test the effect of GIVps down-regulation in the localization of AcPh, cotransfection of *GIVps-antisense* transgenic trophozoites with the plasmids expressing AcPh-V5 was performed and the correct expression of AcPh-V5 observed by immunoblotting (Figure 9C). By IFA and confocal microscopy, we showed that there was a different pattern of AcPh-V5 localization in *GIVps-antisense+AcPh-V5* transgenic trophozoites compared with its localization in *AcPh-V5* transgenic trophozoites (Figure 9D).

## Discussion

Enzyme cytochemical localization for AcPh activity in lysosomal PVs as well as in the endoplasmic reticulum was first described in 1987 [33]. Although AcPh function during trophozoite growth and encystation remains in question, it was shown that dephosphorylation of the cyst wall proteins by AcPh is a required step for *Giardia* excystation [57]. Nevertheless, it is now clear that acid phosphatase activity and localization depend on a particular

lysosomal protein trafficking, with exclusion of AcPh from other secretory pathways such as the constitutive surface membrane or regulated secretory proteins [11,13,58]. In the current report, we identified a membrane protein (GIVps) that fulfills the basic requirements for an AcPh receptor in *Giardia*. This contains a WD40-domain that was shown to participate in protein-protein interaction, and a C-terminal cytosolic tail containing a sequence signal for binding to sorting adaptor proteins. GIVps is present in the ER and rarely in PVs and colocalizes with AcPh. Depletion of GIVps or  $\mu 1$  [13] modified the activity and the location of AcPh, with  $\mu 1$  knock-down producing a missorting of GIVps to the cytoplasm.

In other parasites, acid phosphatase has been proposed as a virulence factor [59,60,61,62]. However, the AcPh from *Giardia* does not seem to be secreted, even in contact with intestinal cells [63]. It is possible that its function may be restricted in order to accomplish the excystation process, but it is striking that this hydrolase was invariably expressed during the entire life cycle. Unlike acid phosphatases from other microorganisms, AcPh is a

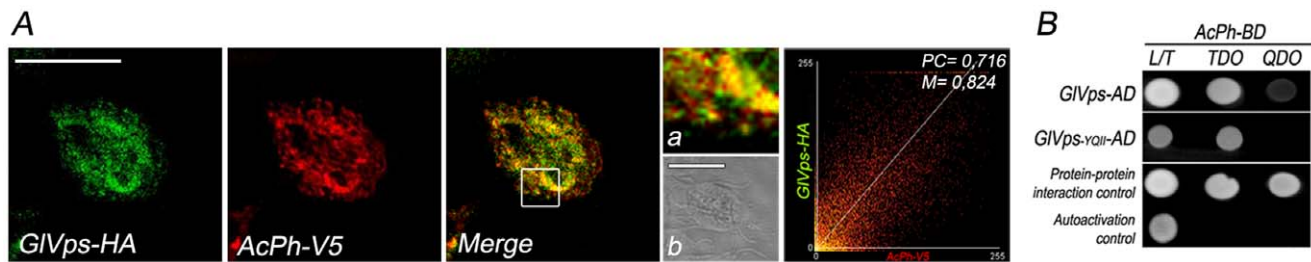

**Figure 8. GIVps and AcPh colocalized throughout the lysosomal pathway.** (A) Direct IFA and confocal microscopy show the colocalization (Merge) of GIVps (green) and AcPh-V5H<sub>6</sub> (red) using directed labeled anti-HA and anti-V5, respectively. Inset magnifies a region of the cell and shows colocalization of the green and red fluorescence in yellow (a). Differential interference contrast microscopy (b) is shown as insert. Scatter plot of the two labels confirms the colocalization (right panel). Bar, 10  $\mu$ m. (B) AcPh/GIVps and AcPh/GIVps<sub>YQII</sub> interaction was detected by the ability of yeast cells (AH109) to grow on selective plates TDO. No interaction was observed in the high-stringency QDO medium. Controls of the methodology include testing of pESCP-AD/p $\mu$ 1-BD (protein-protein interaction) and pGIVps-AD/pGBKT7 (autoactivation). doi:10.1371/journal.pone.0043712.g008

soluble protein that needs to be specifically sorted to the PVs by a receptor. Therefore, the finding that GIVps and AcPh interact and also colocalize in the ER and in the PVs area suggests that they might travel together from the recruitment and sorting site (around the nuclei) to the lysosomal PVs. Like AcPh, the lysosomal cathepsin B-like cysteine proteases GICP1, GICP2, and GICP3 [64,65] were observed in both the peripheral TVN (tubulovesicular network) and the perinuclear region. However, cathepsin activity, identified by in situ cleavage of the MNA derivatized peptide substrate, was localized to the same region of the cell and [65] excluded from the PVs and the BZ as was shown in this report for AcPh activity. Thus, GIVps might unlikely be the receptor for all the soluble hydrolases present in *Giardia* trophozoites.

Following the mechanisms described for yeast and mammalian cells, GIVps might dissociate from AcPh when they reach the acidic pH of the PVs and the receptor recycles back via the retromer complex (reviewed by [66]). In fact, the cargo-selection subunit GIVps35, homologous to Vps35 of the yeast retromer, was pulled-down together with AcPh and GIVps [67]. Since there is no distinguished prevacuolar compartment in *Giardia*, it is possible that this process of docking-dissociation-recycling occurs almost at the same time, with the AcPh-GIVps-GIVps35 interaction being possible. Experiments concentrating on the functional participation of GIVps35 and the *Giardia* retromer complex in GIVps recycling are currently underway to test this hypothesis. Also, a combination of genetic and biochemical approaches analyzing the interaction between AcPh and kinesin might contribute to the elucidation of the link between lysosomal protein trafficking and microtubule tracks, where the kinesin-like motor protein might be involved [68].

The identification of the WD40 domain in GIVps together with its subcellular localization suggest that it might behave like the human WD40 protein, WIP149 (later termed WIP1) or the yeast-orthologous Vps18p, with the capacity to regulate endosomal trafficking of proteins and autophagosome formation [69,70]. Besides the presence of the immunoreactive band at the size of GIVps-HA, a higher band, probably corresponding to the size of GIVps homodimer, was observed, suggesting that this protein might interact with itself, as has been shown for several proteins containing one or more WD40 domains [71,72]. However, we cannot exclude the possibility that the higher molecular weight complex also contains a different protein of similar size that interacts with GIVps. The absence of a cleavable N-terminal signal peptide, and the use of a signal-anchor sequence that directs translocation of the N-terminal domain across the membrane,

designate GIVps as a type III-like membrane protein [46]. In the case of GIVps, the orientation of signal-anchor proteins in the ER membrane seemed to be dictated to a large extent by the charge distribution in the residues that flank either side of the TM domain, with a net internal positive charge favoring an N<sub>luminal</sub>/C<sub>cytoplasmic</sub> topology.

Transport of the yeast Vps10p along the prevacuolar endosome-like/vacuolar pathway requires clathrin and the adaptors Gga1p and Gga2p [73]. Deletion of both genes impairs proteolytic processing of the inactive precursors of the vacuolar hydrolase CPY [74]. Interestingly, Vps10p does not have the canonical DXXLL signals that are involved in the recognition by the Ggas, with the possibility that the yeast Ggas might recognize a different sorting motif [55]. Moreover, while Vps10p contains two aromatic-based signals, YSSL and FYVF, in its cytoplasmic tail, the mutation of individual AP1 subunits or deletion of the whole complex in yeast results in no measurable protein-trafficking phenotype [75]. We showed that the cytoplasmic YQII motif of GIVps is essential for the proper localization and stability of this receptor. Because this lysosomal motif was critical for GIVps- $\mu$ 1 interaction, we presumed that the AP1 complex together with clathrin might be participating in the trafficking of the receptor, similar to the transport of the lysosomal membrane protein ESCP [13]. YQII-deleted GIVps and GIVps from  $\mu$ 1 depleted trophozoites were proteolytically processed, suggesting that either the absence of the sorting motif or the lack of the adaptor counterpart this receptor might be degraded in the PVs or in the cytoplasm by proteasome. It is now known that integral membrane proteins with misfolded cytoplasmic domains go through ubiquitin and proteasome-mediated degradation [76,77,78]. Further investigations are needed to clarify this observation.

Again and again, analysis of *Giardia* protein trafficking showed many particularities, although a minimal machinery is still conserved. Similar to what happens in yeast, AcPh-GIVps interaction seems to be independent of oligosaccharides since protein glycosylation is controversial in this parasite, as there is no definitive evidence for either N- or O-glycosylation in any *Giardia* protein [79,80]. Analysis of lysosomal proteins like AcPh and GIVps disclose some interesting differences between *Giardia* and other cells. For instance, while AcPh is a soluble enzyme in *Giardia*, it exists as a membrane protein in all cells described so far [81,82,83]. The presence of a YXX $\Phi$ -type internalization sequence in these type-I membrane AcPhs allows several cycles of plasma membrane internalization and recycling for transport to the lysosome. Moreover, while the AcPh tail interacts with AP2 in cells as diverse as *Leishmania* and humans, the lysosomal traffic of

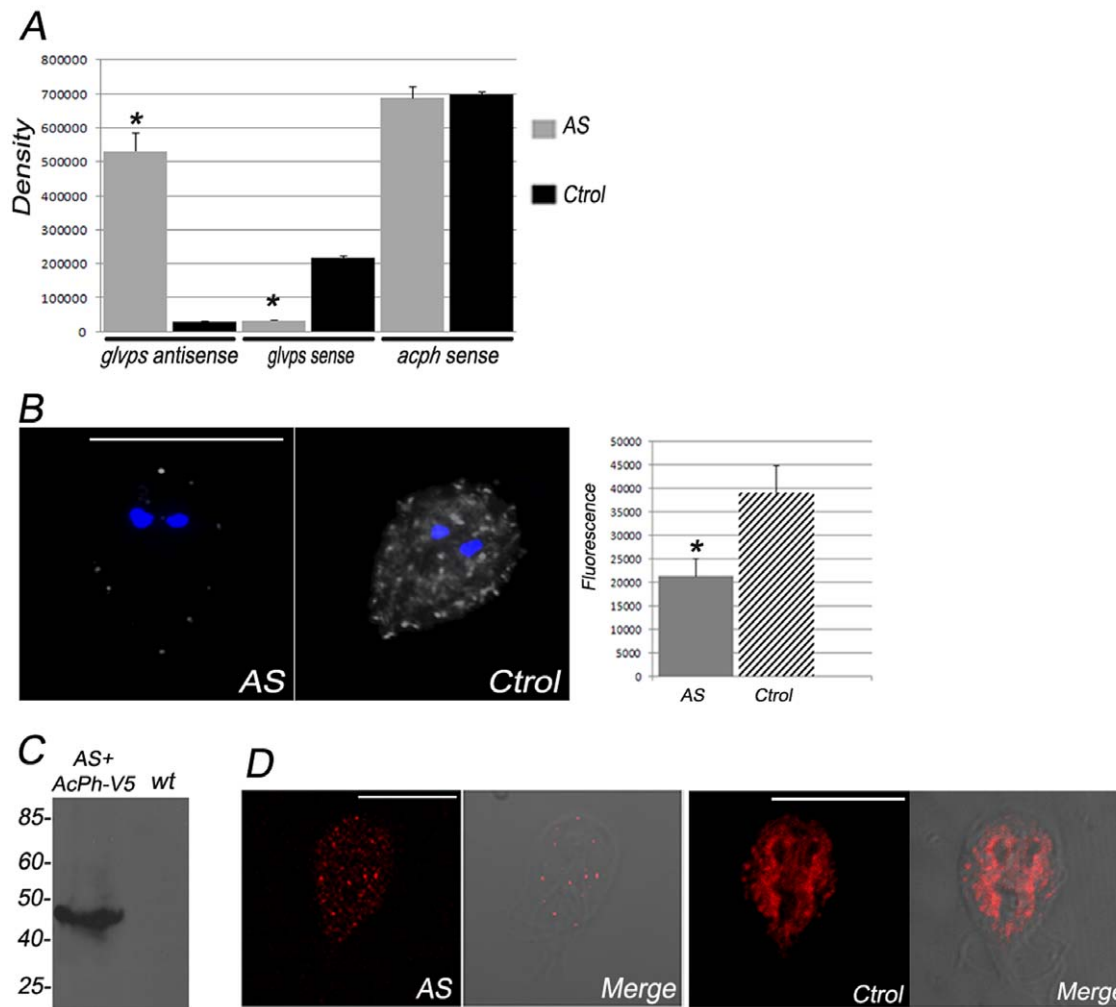

**Figure 9. GIVps depletion affects AcPh localization and activity.** (A) Bars indicate densitometric assessment of one representative RT-PCR experiment using 10 ng of total RNA from *GLVps-antisense* (AS) and *empty* (Ctrl) transgenic trophozoites. The densitometric analysis shows the production of *glvps-antisense* RNA in AS trophozoites but not in Ctrl cells. On the contrary, the *glvps* transcripts are highly reduced only in AS cells. *acph* mRNA was not altered in these cells. All transcripts were normalized against *gdh* endogenous control before graphic construction. Results are the means  $\pm$  S.D. of three independent experiments (\* $p < 0.0001$ ). (B) By using the specific substrate ELF97 at pH 5.5, a notably reduction of acid phosphatase activity is observed in *GLVps-antisense* (AS) compared with *empty* (Ctrl) transgenic trophozoites. Nuclear DNA was labeled with DAPI (blue). One representative picture is shown. Bar, 10  $\mu$ m. The graph on the left shows the quantitative fluorescent measurements of ELF97 (acid phosphatase activity). A significant decrease in mean fluorescence in AS cells is observed when compared with Ctrl cells (\* $p < 0.0001$ ). The mean fluorescence of all the acidic vesicles was calculated within each cell. Results are the means  $\pm$  S.D. of 100 independent cells/group. (C) Crude protein extract from equal numbers of *GLVps-antisense+AcPh-V5* transgenic and *wild-type* (wt) trophozoites was separated by SDS-PAGE and analyzed by immunoblotting using anti-V5 mAb. Relative molecular weights of protein standards (kDa) are indicated on the left. (D) AcPh-V5 is mislocalized in *GLVps-antisense+AcPh-V5* (AS) transgenic trophozoites compared with control *AcPh-V5* transgenic trophozoites (Ctrl). doi:10.1371/journal.pone.0043712.g009

*Giardia* AcPh depends on AP1 [13]. Since much of the machinery involved in lysosomal trafficking is derived from a few protein families performing the same basic mechanistic function, the analysis of the similarities and differences between organisms might provide further insight into parasite behavior and eukaryotic cell evolution.

## Supporting Information

**Figure S1 V5-tagged AcPh localizes to the PVs, bare zone and ER.** (A) Electromicrograph of a growing *Giardia* trophozoite showing the PVs located underneath the plasma membrane (in red) and the bare area (in blue). Nuclei (\*) and flagella (fg) are also shown. Bar, 0.5  $\mu$ m. (a) Electromicrograph of

the control using secondary antibody alone. Bar, 0.2  $\mu$ m. (B) Enlarged immunoelectromicrograph of the PVs. AcPh-V5 seems to be detected inside the PVs (arrowhead). (C) Enlarged electromicrograph of the bare area showing some AcPh-V5 localization. (D) Immunoelectromicrograph showing the distinctive distribution of AcPh-V5 on the body of the cell. Bar, 0.1  $\mu$ m. (TIF)

**Table S1 Table shows AcPh associated proteins analyzed by LC-MS/MS.** SDS-PAGE, and submitted to the Research Technologies Branch for Protein Identification (NIAID, NIH) for analysis. After three independent experiments, three proteins associated with AcPh were identified (Figure 2A–B and Table S1). (DOC)

## Author Contributions

Conceived and designed the experiments: MRR SLM MCT. Performed the experiments: MRR SLM CF NZ SFH. Analyzed the data: SLM RQ MCT. Wrote the paper: MCT ASR.

## References

- Rodriguez-Boulan E, Musch A (2005) Protein sorting in the Golgi complex: shifting paradigms. *Biochim Biophys Acta* 1744: 455–464.
- Braulke T, Bonifacino JS (2009) Sorting of lysosomal proteins. *Biochim Biophys Acta* 1793: 605–614.
- Marcusson EG, Horazdovsky BF, Cereghino JL, Gharakhanian E, Emr SD (1994) The sorting receptor for yeast vacuolar carboxypeptidase Y is encoded by the VPS10 gene. *Cell* 77: 579–586.
- Winther JR, Stevens TH, Kiehlbrandt MC (1991) Yeast carboxypeptidase Y requires glycosylation for efficient intracellular transport, but not for vacuolar sorting, in vivo stability, or activity. *Eur J Biochem* 197: 681–689.
- Jørgensen MU, Emr SD, Winther JR (1999) Ligand recognition and domain structure of Vps10p, a vacuolar protein sorting receptor in *Saccharomyces cerevisiae*. *Eur J Biochem* 260: 461–469.
- Traub LM (2009) Tickets to ride: selecting cargo for clathrin-regulated internalization. *Nat Rev Mol Cell Biol* 10: 583–596.
- Lujan HD, Touz MC (2003) Protein trafficking in *Giardia lamblia*. *Cell Microbiol* 5: 427–434.
- Faso C, Hehl AB (2011) Membrane trafficking and organelle biogenesis in *Giardia lamblia*: use it or lose it. *Int J Parasitol* 41: 471–480.
- Mowbrey K, Dacks JB (2009) Evolution and diversity of the Golgi body. *FEBS Lett* 583: 3738–3745.
- Morrison HG, McArthur AG, Gillin FD, Aley SB, Adam RD, et al. (2007) Genomic minimalism in the early diverging intestinal parasite *Giardia lamblia*. *Science* 317: 1921–1926.
- Lanfredi-Rangel A, Attias M, de Carvalho TM, Kattenbach WM, De Souza W (1998) The peripheral vesicles of trophozoites of the primitive protozoan *Giardia lamblia* may correspond to early and late endosomes and to lysosomes. *J Struct Biol* 123: 225–235.
- Touz MC, Lujan HD, Hayes SF, Nash TE (2003) Sorting of encystation-specific cysteine protease to lysosome-like peripheral vacuoles in *Giardia lamblia* requires a conserved tyrosine-based motif. *J Biol Chem* 278: 6420–6426.
- Touz MC, Kulakova L, Nash TE (2004) Adaptor protein complex 1 mediates the transport of lysosomal proteins from a Golgi-like organelle to peripheral vacuoles in the primitive eukaryote *Giardia lamblia*. *Mol Biol Cell* 15: 3053–3060.
- Rivero MR, Vranich CV, Bisbal M, Maletto BA, Ropolo AS, et al. (2010) Adaptor Protein 2 Regulates Receptor-Mediated Endocytosis and Cyst Formation in *Giardia lamblia*. *Biochem J*.
- Lujan HD, Mowatt MR, Conrad JT, Nash TE (1996) Increased expression of the molecular chaperone BIP/GRP78 during the differentiation of a primitive eukaryote. *Biol Cell* 86: 11–18.
- Nash TE, Conrad JT, Mowatt MR (1995) *Giardia lamblia*: identification and characterization of a variant-specific surface protein gene family. *J Eukaryot Microbiol* 42: 604–609.
- Nash TE, Aggarwal A, Adam RD, Conrad JT, Merritt JW Jr (1988) Antigenic variation in *Giardia lamblia*. *J Immunol* 141: 636–641.
- Keister DB (1983) Axenic culture of *Giardia lamblia* in TYI-S-33 medium supplemented with bile. *Trans R Soc Trop Med Hyg* 77: 487–488.
- Touz MC, Conrad JT, Nash TE (2005) A novel palmitoyl acyl transferase controls surface protein palmitoylation and cytotoxicity in *Giardia lamblia*. *Mol Microbiol* 58: 999–1011.
- Elmendorf HG, Singer SM, Nash TE (2001) The abundance of sterile transcripts in *Giardia lamblia*. *Nucleic Acids Res* 29: 4674–4683.
- Singer SM, Yee J, Nash TE (1998) Episomal and integrated maintenance of foreign DNA in *Giardia lamblia*. *Mol Biochem Parasitol* 92: 59–69.
- Yee J, Nash TE (1995) Transient transfection and expression of firefly luciferase in *Giardia lamblia*. *Proc Natl Acad Sci U S A* 92: 5615–5619.
- Meagher J, Zellweger R, Filgueira L (2005) Functional dissociation of the basolateral transcytotic compartment from the apical phago-lysosomal compartment in human osteoclasts. *J Histochem Cytochem* 53: 665–670.
- Cox WG, Singer VL (1999) A high-resolution, fluorescence-based method for localization of endogenous alkaline phosphatase activity. *J Histochem Cytochem* 47: 1443–1456.
- Filgueira L (2004) Fluorescence-based staining for tartrate-resistant acidic phosphatase (TRAP) in osteoclasts combined with other fluorescent dyes and protocols. *J Histochem Cytochem* 52: 411–414.
- van Aarle IM, Cavagnaro TR, Smith SE, Smith FA, Dickson S (2005) Metabolic activity of *Glomus intraradices* in Arum- and Paris-type arbuscular mycorrhizal colonization. *New Phytol* 166: 611–618.
- Zinchuk V, Zinchuk O, Okada T (2007) Quantitative colocalization analysis of multicolor confocal immunofluorescence microscopy images: pushing pixels to explore biological phenomena. *Acta Histochem Cytochem* 40: 101–111.
- Garcia Penarrubia P, Perez Ruiz X, Galvez J (2005) Quantitative analysis of the factors that affect the determination of colocalization coefficients in dual-color confocal images. *IEEE Trans Image Process* 14: 1151–1158.
- Sun H, Crossland WJ (2000) Quantitative assessment of localization and colocalization of glutamate, aspartate, glycine, and GABA immunoreactivity in the chick retina. *Anat Rec* 260: 158–179.
- Zhu C, Barker RJ, Hunter AW, Zhang Y, Jourdan J, et al. (2005) Quantitative analysis of ZO-1 colocalization with Cx43 gap junction plaques in cultures of rat neonatal cardiomyocytes. *Microsc Microanal* 11: 244–248.
- Gabernet-Castello C, Dacks JB, Field MC (2009) The single ENTH-domain protein of trypanosomes; endocytic functions and evolutionary relationship with epsin. *Traffic* 10: 894–911.
- Rivero MR, Miras SL, Quiroga R, Ropolo AS, Touz MC (2011) *Giardia lamblia* low-density lipoprotein receptor-related protein is involved in selective lipoprotein endocytosis and parasite replication. *Mol Microbiol* 79: 1204–1219.
- Feely DE, Dyer JK (1987) Localization of acid phosphatase activity in *Giardia lamblia* and *Giardia muris* trophozoites. *J Protozool* 34: 80–83.
- House SA, Richter DJ, Pham JK, Dawson SC (2011) *Giardia* flagellar motility is not directly required to maintain attachment to surfaces. *PLoS Pathog* 7: e1002167.
- Hehl AB, Marti M (2004) Secretory protein trafficking in *Giardia intestinalis*. *Mol Microbiol* 53: 19–28.
- Zdobnov EM, Apweiler R (2001) InterProScan—an integration platform for the signature-recognition methods in InterPro. *Bioinformatics* 17: 847–848.
- Cole C, Barber JD, Barton GJ (2008) The Jpred 3 secondary structure prediction server. *Nucleic Acids Res* 36: W197–201.
- Kall L, Krogh A, Sonnhammer EL (2004) A combined transmembrane topology and signal peptide prediction method. *J Mol Biol* 338: 1027–1036.
- Chin DJ, Luskey KL, Anderson RG, Faust JR, Goldstein JL, et al. (1982) Appearance of crystalloid endoplasmic reticulum in compactin-resistant Chinese hamster cells with a 500-fold increase in 3-hydroxy-3-methylglutaryl-coenzyme A reductase. *Proc Natl Acad Sci U S A* 79: 1185–1189.
- Orci L, Brown MS, Goldstein JL, Garcia-Segura LM, Anderson RG (1984) Increase in membrane cholesterol: a possible trigger for degradation of HMG CoA reductase and crystalloid endoplasmic reticulum in UT-1 cells. *Cell* 36: 835–845.
- Jackson MR, Nilsson T, Peterson PA (1990) Identification of a consensus motif for retention of transmembrane proteins in the endoplasmic reticulum. *EMBO J* 9: 3153–3162.
- Bendtsen JD, Jensen LJ, Blom N, Von Heijne G, Brunak S (2004) Feature-based prediction of non-classical and leaderless protein secretion. *Protein Eng Des Sel* 17: 349–356.
- Bendtsen JD, Kiemer L, Fausboll A, Brunak S (2005) Non-classical protein secretion in bacteria. *BMC Microbiol* 5: 58.
- von Heijne G (1999) Recent advances in the understanding of membrane protein assembly and structure. *Q Rev Biophys* 32: 285–307.
- von Heijne G (1992) Membrane protein structure prediction. Hydrophobicity analysis and the positive-inside rule. *J Mol Biol* 225: 487–494.
- Goder V, Spiess M (2001) Topogenesis of membrane proteins: determinants and dynamics. *FEBS Lett* 504: 87–93.
- Sipos L, von Heijne G (1993) Predicting the topology of eukaryotic membrane proteins. *Eur J Biochem* 213: 1333–1340.
- Kall L, Krogh A, Sonnhammer EL (2007) Advantages of combined transmembrane topology and signal peptide prediction—the Phobius web server. *Nucleic Acids Res* 35: W429–432.
- Quistgaard EM, Madsen P, Groftehauge MK, Nissen P, Petersen CM, et al. (2009) Ligands bind to Sortilin in the tunnel of a ten-bladed beta-propeller domain. *Nat Struct Mol Biol* 16: 96–98.
- Quistgaard EM, Thirup SS (2009) Sequence and structural analysis of the Asp-box motif and Asp-box beta-propellers; a widespread propeller-type characteristic of the Vps10 domain family and several glycoside hydrolase families. *BMC Struct Biol* 9: 46.
- Lorenz H, Hailey DW, Lippincott-Schwartz J (2006) Fluorescence protease protection of GFP chimeras to reveal protein topology and subcellular localization. *Nat Methods* 3: 205–210.
- Adam RD (2001) Biology of *Giardia lamblia*. *Clin Microbiol Rev* 14: 447–475.
- McCaffery JM, Gillin FD (1994) *Giardia lamblia*: ultrastructural basis of protein transport during growth and encystation. *Exp Parasitol* 79: 220–235.
- Cereghino JL, Marcusson EG, Emr SD (1995) The cytoplasmic tail domain of the vacuolar protein sorting receptor Vps10p and a subset of VPS gene products regulate receptor stability, function, and localization. *Mol Biol Cell* 6: 1089–1102.
- Bonifacino JS (2004) The GGA proteins: adaptors on the move. *Nat Rev Mol Cell Biol* 5: 23–32.
- Boehm M, Bonifacino JS (2001) Adaptins: the final recount. *Mol Biol Cell* 12: 2907–2920.
- Slavin I, Saura A, Carranza PG, Touz MC, Nores MJ, et al. (2002) Dephosphorylation of cyst wall proteins by a secreted lysosomal acid

- phosphatase is essential for excystation of *Giardia lamblia*. *Mol Biochem Parasitol* 122: 95–98.
58. Reiner DS, McCaffery M, Gillin FD (1990) Sorting of cyst wall proteins to a regulated secretory pathway during differentiation of the primitive eukaryote, *Giardia lamblia*. *Eur J Cell Biol* 53: 142–153.
  59. Singla N, Khuller GK, Vinayak VK (1992) Acid phosphatase activity of promastigotes of *Leishmania donovani*: a marker of virulence. *FEMS Microbiol Lett* 73: 221–225.
  60. Baca OG, Roman MJ, Glew RH, Christner RF, Buhler JE, et al. (1993) Acid phosphatase activity in *Coxiella burnetii*: a possible virulence factor. *Infect Immun* 61: 4232–4239.
  61. Aguirre-Garcia MM, Okhuysen PC (2007) *Cryptosporidium parvum*: identification and characterization of an acid phosphatase. *Parasitol Res* 101: 85–89.
  62. Leibowitz MP, Ofir R, Golan-Goldhirsh A, Zilberg D (2009) Cysteine proteases and acid phosphatases contribute to *Tetrahymena* spp. pathogenicity in guppies, *Poecilia reticulata*. *Vet Parasitol* 166: 21–26.
  63. Ringqvist E, Palm JE, Skarin H, Hehl AB, Weiland M, et al. (2008) Release of metabolic enzymes by *Giardia* in response to interaction with intestinal epithelial cells. *Mol Biochem Parasitol*.
  64. Ward W, Alvarado L, Rawlings ND, Engel JC, Franklin C, et al. (1997) A primitive enzyme for a primitive cell: the protease required for excystation of *Giardia*. *Cell* 89: 437–444.
  65. Abodeely M, DuBois KN, Hehl A, Stefanic S, Sajid M, et al. (2009) A contiguous compartment functions as endoplasmic reticulum and endosome/lysosome in *Giardia lamblia*. *Eukaryot Cell* 8: 1665–1676.
  66. Bonifacino JS, Hurley JH (2008) Retromer. *Curr Opin Cell Biol* 20: 427–436.
  67. Touz MC, Rivero MR, Miras SL, Bonifacino JS (2012) Lysosomal protein trafficking in *Giardia lamblia*: common and distinct features. *Front Biosci (Elite Ed)* 4: 1898–1909.
  68. Lakkaraju A, Carvajal-Gonzalez JM, Rodriguez-Boulan E (2009) It takes two to tango to the melanosome. *J Cell Biol* 187: 161–163.
  69. Jeffries TR, Dove SK, Michell RH, Parker PJ (2004) PtdIns-specific MPR pathway association of a novel WD40 repeat protein, WIPI49. *Mol Biol Cell* 15: 2652–2663.
  70. Obara K, Sekito T, Niimi K, Ohsumi Y (2008) The Atg18-Atg2 complex is recruited to autophagic membranes via phosphatidylinositol 3-phosphate and exerts an essential function. *J Biol Chem* 283: 23972–23980.
  71. Thornton C, Tang KC, Phamluong K, Luong K, Vagts A, et al. (2004) Spatial and temporal regulation of RACK1 function and N-methyl-D-aspartate receptor activity through WD40 motif-mediated dimerization. *J Biol Chem* 279: 31357–31364.
  72. Jorgensen ND, Peng Y, Ho CC, Rideout HJ, Petrey D, et al. (2009) The WD40 domain is required for LRRK2 neurotoxicity. *PLoS ONE* 4: e8463.
  73. Hirst J, Lui WW, Bright NA, Totty N, Seaman MN, et al. (2000) A family of proteins with gamma-adaptin and VHS domains that facilitate trafficking between the trans-Golgi network and the vacuole/lysosome. *J Cell Biol* 149: 67–80.
  74. Costaguta G, Stefan CJ, Bensen ES, Emr SD, Payne GS (2001) Yeast Gga coat proteins function with clathrin in Golgi to endosome transport. *Mol Biol Cell* 12: 1885–1896.
  75. Hirst J, Lindsay MR, Robinson MS (2001) GGAs: roles of the different domains and comparison with AP-1 and clathrin. *Mol Biol Cell* 12: 3573–3588.
  76. Vashist S, Ng DT (2004) Misfolded proteins are sorted by a sequential checkpoint mechanism of ER quality control. *J Cell Biol* 165: 41–52.
  77. Raasi S, Wolf DH (2007) Ubiquitin receptors and ERAD: a network of pathways to the proteasome. *Semin Cell Dev Biol* 18: 780–791.
  78. Nakatsukasa K, Hoyer G, Michaelis S, Brodsky JL (2008) Dissecting the ER-associated degradation of a misfolded polytopic membrane protein. *Cell* 132: 101–112.
  79. Lujan HD, Marotta A, Mowatt MR, Sciaky N, Lippincott-Schwartz J, et al. (1995) Developmental induction of Golgi structure and function in the primitive eukaryote *Giardia lamblia*. *J Biol Chem* 270: 4612–4618.
  80. Papanastasiou P, McConville MJ, Ralton J, Kohler P (1997) The variant-specific surface protein of *Giardia*, VSP4A1, is a glycosylated and palmitoylated protein. *Biochem J* 322 (Pt 1): 49–56.
  81. Gottlieb M, Dwyer DM (1981) *Leishmania donovani*: surface membrane acid phosphatase activity of promastigotes. *Exp Parasitol* 52: 117–128.
  82. Waheed A, Gottschalk S, Hille A, Krentler C, Pohlmann R, et al. (1988) Human lysosomal acid phosphatase is transported as a transmembrane protein to lysosomes in transfected baby hamster kidney cells. *Embo J* 7: 2351–2358.
  83. Shakarian AM, Joshi MB, Ghedin E, Dwyer DM (2002) Molecular dissection of the functional domains of a unique, tartrate-resistant, surface membrane acid phosphatase in the primitive human pathogen *Leishmania donovani*. *J Biol Chem* 277: 17994–18001.
  84. Soding J, Biegert A, Lupas AN (2005) The HHpred interactive server for protein homology detection and structure prediction. *Nucleic Acids Res* 33: W244–248.
  85. Sali A, Potterton L, Yuan F, van Vlijmen H, Karplus M (1995) Evaluation of comparative protein modeling by MODELLER. *Proteins* 23: 318–326.
